# Supplementary material for: Cyclohexyl-substituted non-fullerene small-molecule acceptors for organic solar cells
Source: Royal Society of Chemistry journal article supplement (doi:10.1039/d0nj04240d), 2021-01-01
Supplement: d0nj04240d1.pdf [file d0nj04240d1.pdf]

## Supporting Information

# Cyclohexyl-substituted Non-fullerene Small-molecule Acceptors for Organic Solar Cells

*Seunggyun Hong,<sup>a,#</sup> Chang Eun Song,<sup>b,#</sup> Du Hyeon Ryu,<sup>b</sup> Sang Kyu Lee,<sup>b</sup> Won Suk Shin,<sup>b</sup>  
and Eunhee Lim<sup>\*,c</sup>*

<sup>a</sup> Department of Chemistry, Kyonggi University, 154-42 Gwanggyosan-ro, Yeongtong-gu, Suwon 16227, Republic of Korea

<sup>b</sup> Korea Research Institute of Chemical Technology (KRICT), 141 Gajeongro, Yuseong-gu, Daejeon 34114, Republic of Korea

<sup>c</sup> Department of Applied Chemistry, University of Seoul, 163 Seoulsiripdae-ro, Dongdaemun-gu, Seoul 02504, Republic of Korea

#S. Hong and C. E. Song contributed equally to this work.

\* Corresponding author: Tel. +82-2-6490-2465; E-mail address: [ehlim@uos.ac.kr](mailto:ehlim@uos.ac.kr) (E. Lim)

## 1. NMR spectra

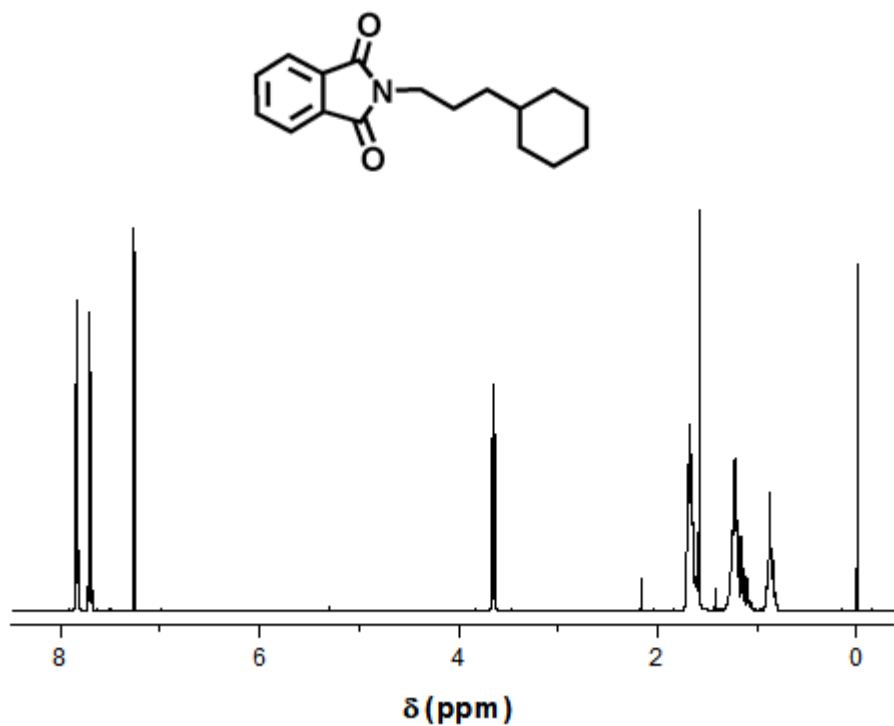

**Figure S1.** <sup>1</sup>H NMR spectrum of Cy6Pphth.

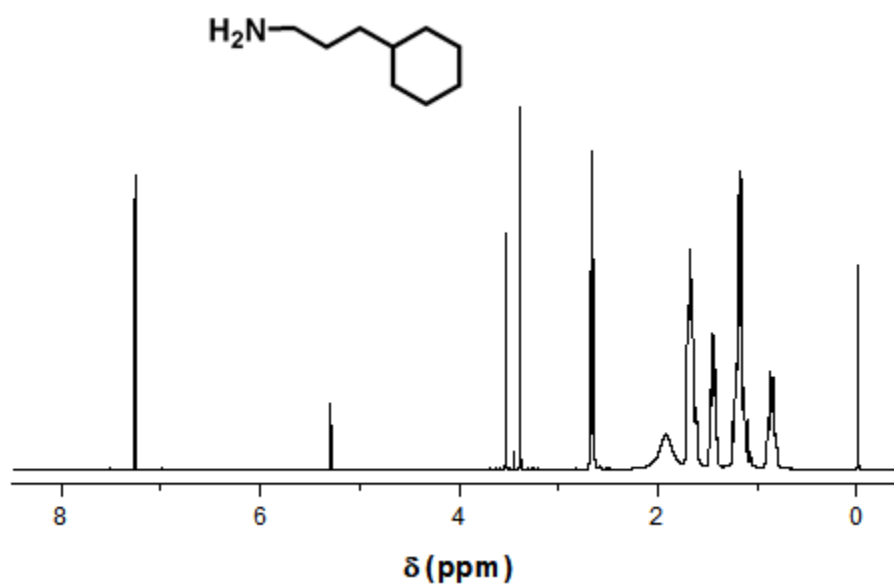

**Figure S2.** <sup>1</sup>H NMR spectrum of Cy6NH<sub>2</sub>.

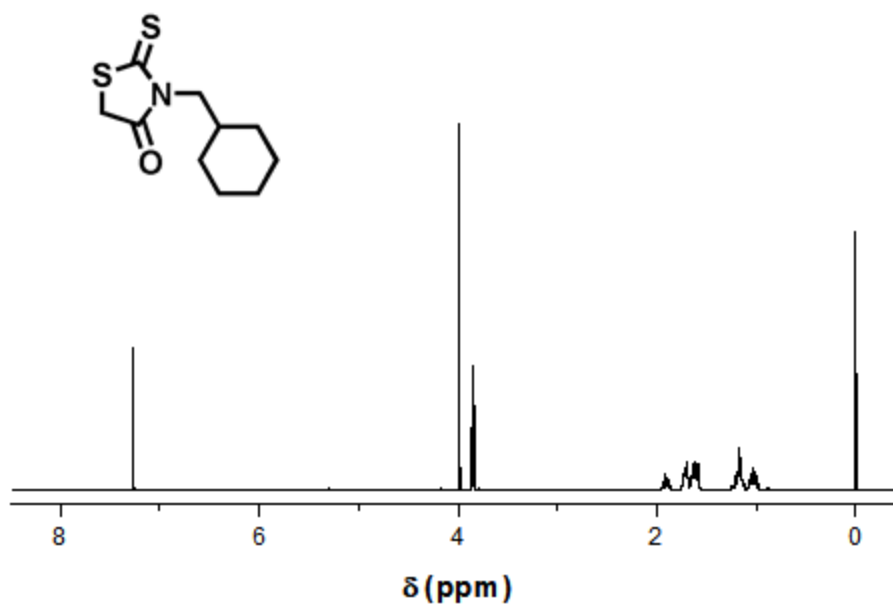

**Figure S3.** <sup>1</sup>H NMR spectrum of Cy6MRH.

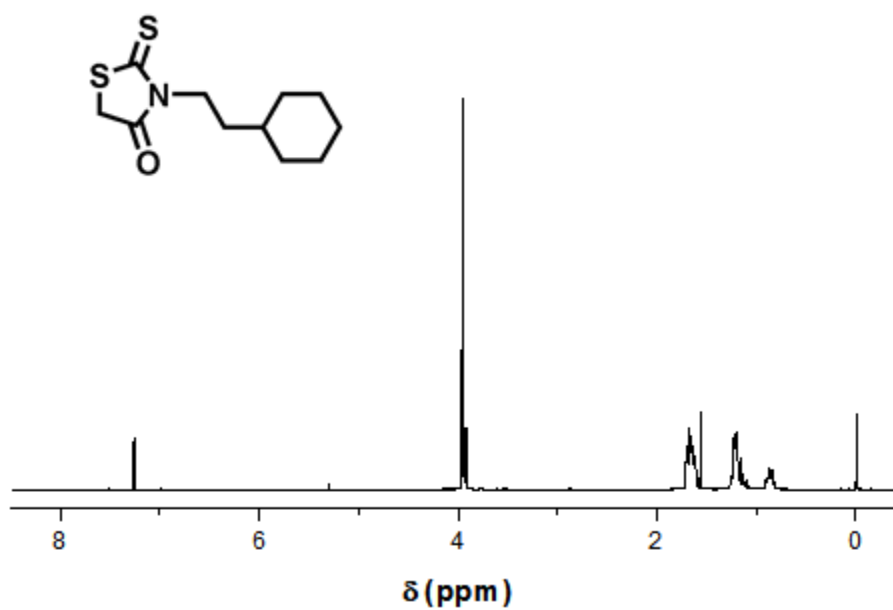

**Figure S4.** <sup>1</sup>H NMR spectrum of Cy6PRH.

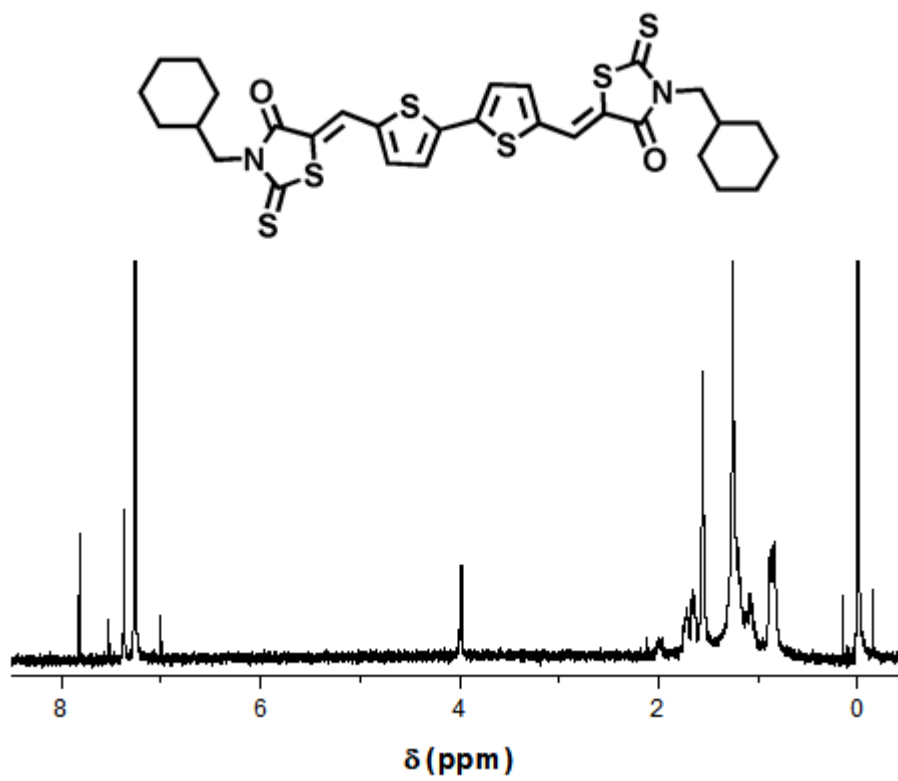

**Figure S5.** <sup>1</sup>H NMR spectrum of T2-Cy6MRH.

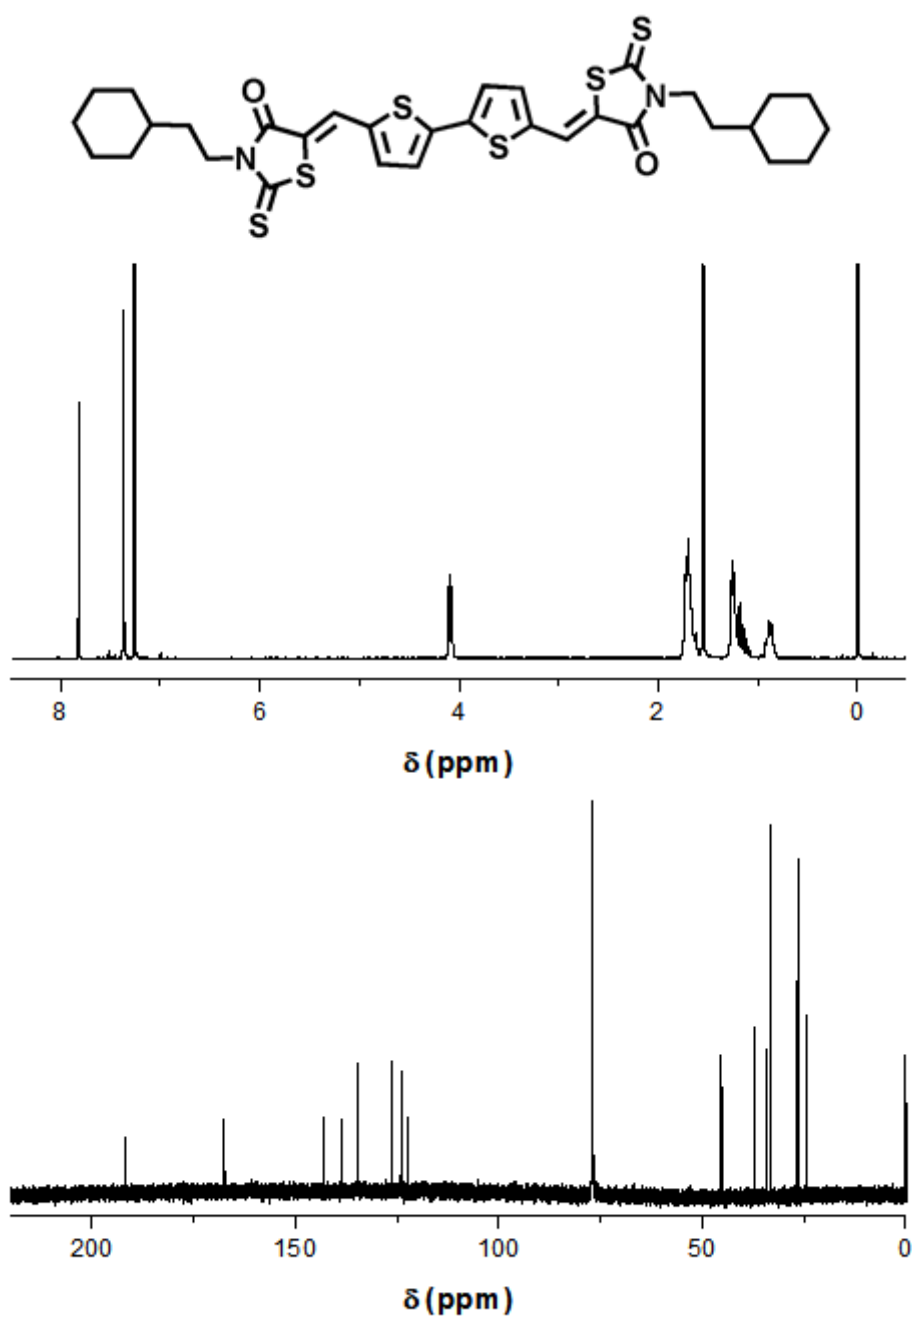

**Figure S6.** <sup>1</sup>H (top) and <sup>13</sup>C (bottom) NMR and MS spectra of T2-Cy6PRH.

**Table S1.** Photovoltaic properties of **T2-Cy6PRH**-based OSCs with different thermal annealing conditions<sup>a</sup>

| Annealing | $V_{OC}$ [V] | $J_{SC}$ [ $\text{mA cm}^{-2}$ ] | $FF$ [%] | PCE [%] |
|-----------|--------------|----------------------------------|----------|---------|
| W/O       | 1.03         | 11.04                            | 40       | 4.60    |
| 90°C      | 1.00         | 9.83                             | 41       | 4.00    |
| 120°C     | 1.00         | 8.81                             | 40       | 3.57    |

<sup>a</sup>Inverted device architecture is ITO/ZnO NPs/PEIE/PTB7-Th:**T2-Cy6PRH** (1.0:2.0, chloroform,  $d = \sim 100$  nm)/MoO<sub>x</sub>/Ag.

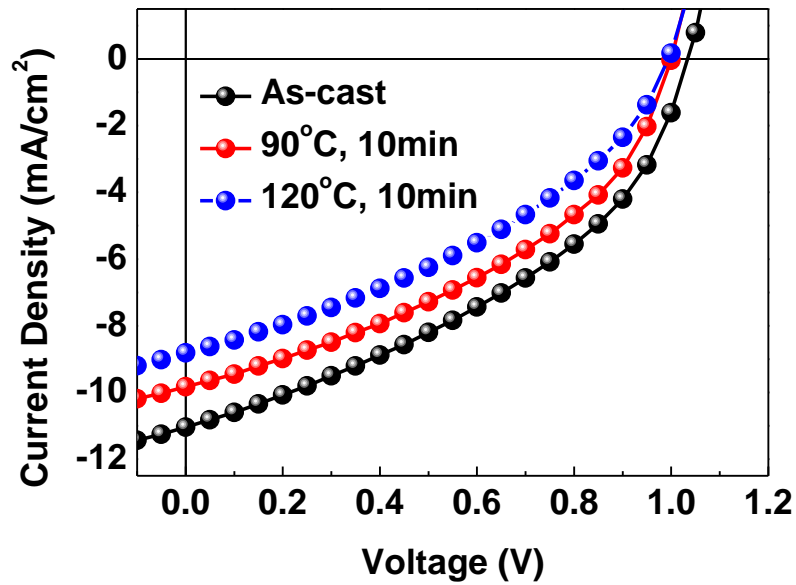

**Figure S7.**  $I$ - $V$  curves of the device based on **T2-Cy6PRH** and PTB7-Th under different thermal annealing conditions

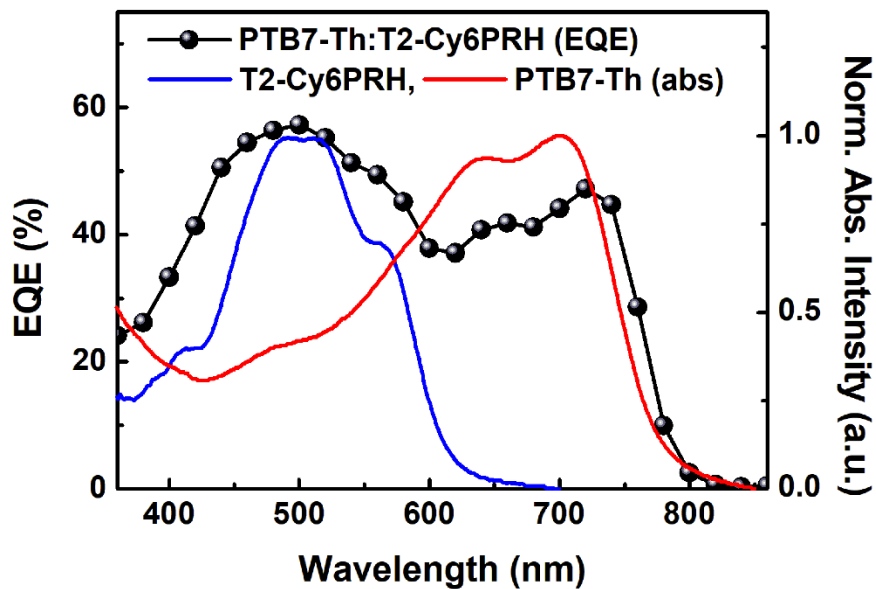

**Figure S8.** EQE curves of the PTB7-Th:T2-Cy6PRH device (as-cast) together with the absorption spectra of the neat T2-Cy6PRH and PTB7-Th films.

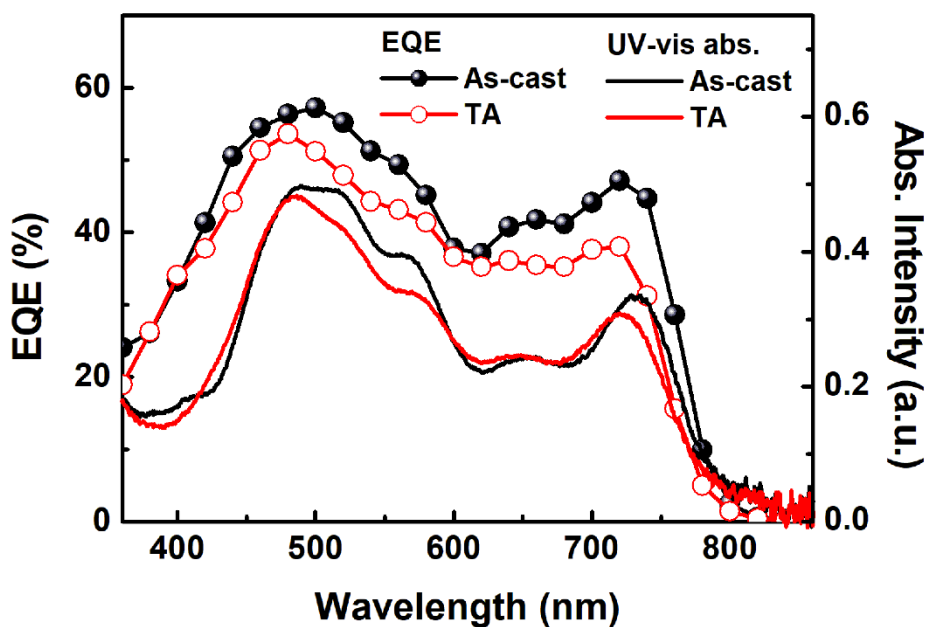

**Figure S9.** EQE curves of the PTB7-Th:T2-Cy6PRH device and the absorption spectra of the PTB7-Th:T2-Cy6PRH blend films under the as-cast and TA conditions.

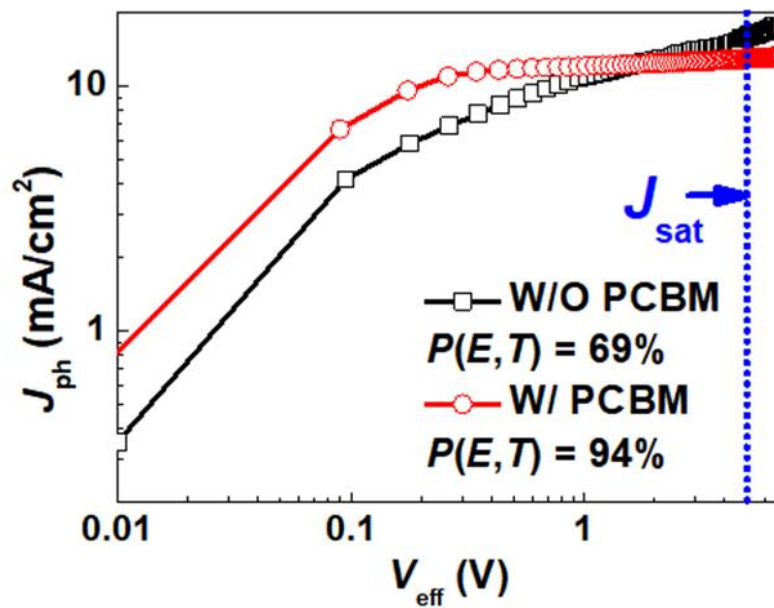

**Figure S10.** Photocurrent density ( $J_{ph}$ ) as a function of the effective voltage ( $V_{eff}$ ) for OSCs based on PTB7-Th:T2-Cy6PRH without and with PCBM third component



**Table S2** Photovoltaic properties of OSCs based on the PTB7-Th:PCBM binary film<sup>a</sup>

| Photoactive layer | $V_{OC}$ [V]                | $J_{SC}$ [ $\text{mA cm}^{-2}$ ] | $FF$ [%]             | PCE [%]                     |
|-------------------|-----------------------------|----------------------------------|----------------------|-----------------------------|
| PTB7-Th:PCBM      | 0.83<br>( $0.82 \pm 0.01$ ) | 12.34<br>( $12.17 \pm 0.16$ )    | 50<br>( $49 \pm 2$ ) | 5.17<br>( $5.02 \pm 0.15$ ) |

<sup>a</sup> Inverted device architecture is ITO/ZnO NPs/PEIE/PTB7-Th:PCBM (1.0:2.0, chloroform,  $d = \sim 100$  nm)/MoO<sub>x</sub>/Ag. The values in parentheses are the average photovoltaic properties obtained from over 10 devices.

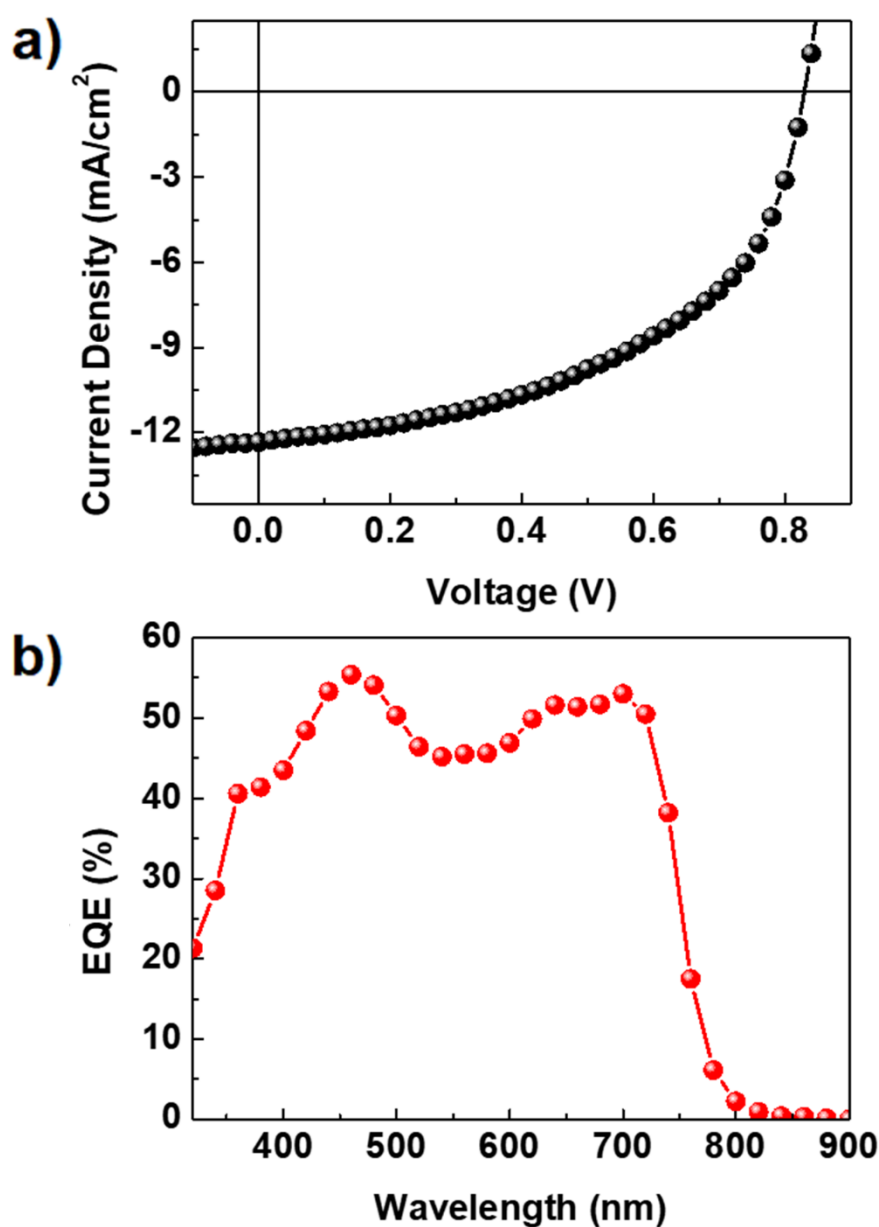

**Figure S11.** (a)  $J$ - $V$  and (b) EQE curves of the device based on PTB7-Th and PCBM.

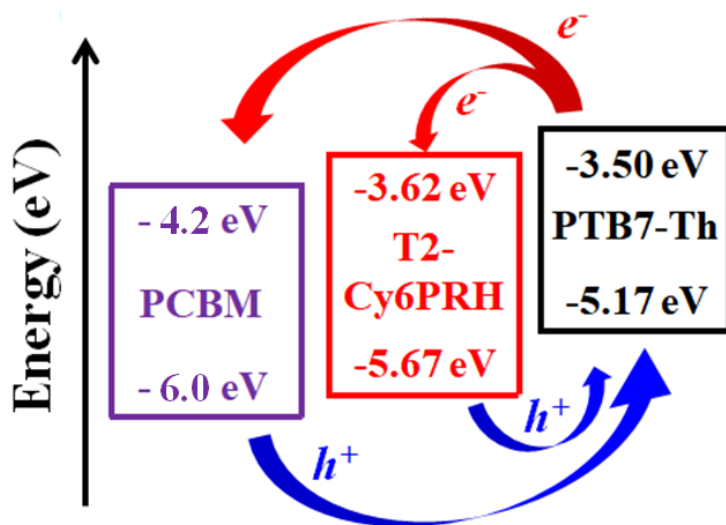

**Figure S12.** Energy band diagrams of the materials used in ternary cell
